# Supplementary material
Source: Springer Nature journal article supplement (https://www.springermedizin.de/resource/supplementary/13054_2012_533_MOESM2_ESM.pdf/9708728)
Supplement: MOESM2 [file 9708728]

Total number of admissions during screening period:  
n=766

Total number of patients screened:  
n=766 (100%)

Number meeting selection criteria:  
n=123 (16.1%)

Number excluded:  
n=643 (83.9%)

Number of patients followed up:  
n=121

Number of patients not followed up:  
n=2

Number who developed acute organ failure:  
n=45 (37.2%)

Number who did not develop acute organ failure:  
n=76 (62.8%)

**Died in ICU:  
n=8 (17.8%)**

**Died in ICU:  
n=3 (4.0%)**

**Died in hospital:  
n=13 (28.9%)**

**Died in hospital:  
n=9 (11.8%)**

**Median (IQR) length of ICU stay:  
11 (17.5) days**

**Median (IQR) length of ICU stay:  
3 (4) days**
